# Supplementary material for: Facile Synthesis of Microporous Carbons from Biomass Waste as High Performance Supports for Dehydrogenation of Formic Acid
Source: MDPI journal article supplement (doi:10.3390/nano11113028), 2021-11-11
Supplement: s1 [file s1]

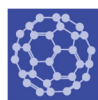

## Supplementary Materials

# Facile synthesis of microporous carbons from biomass waste as high performance supports for dehydrogenation of formic acid

Tingting Cao <sup>1,2,†</sup>, Jinke Cheng <sup>1,2,†</sup>, Jun Ma <sup>1,2</sup>, Chunliang Yang <sup>1,2</sup>, Mengqin Yao <sup>1,2,\*</sup>, Fei Liu <sup>1,2,\*</sup>, Min Deng <sup>1,2</sup>, Xiaodan Wang <sup>1,2</sup> and Yuan Ren <sup>2,\*</sup>

<sup>1</sup> School of Chemistry and Chemical Engineering, Guizhou University, Guiyang 550025, China; caotingting980417@163.com (T.C.); jkcheng@gzu.edu.cn (J.C.); jma3@gzu.edu.cn (J.M.); clyang@gzu.edu.cn (C.Y.); gzu403299473@163.com (M.D.); wangxiaodan0516@126.com (X.W.)

<sup>2</sup> Key Laboratory of Green Chemical and Clean Energy Technology, Guizhou University, Guiyang 550025, China

\* Correspondence: mqyao@gzu.edu.cn (M.Y.); ce.feiliu@gzu.edu.cn (F.L.); renyuan\_1986@126.com (Y.R.)

† These two authors contributed equally to this work.

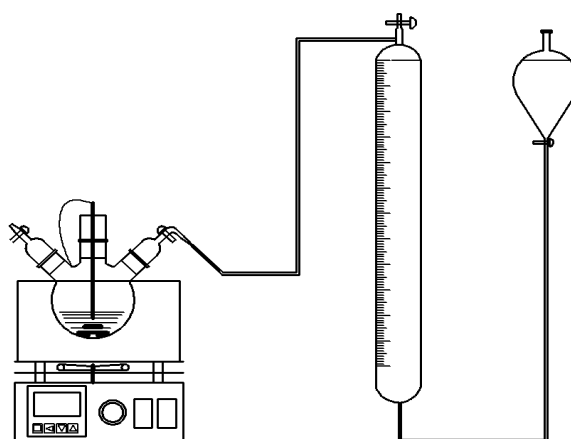

**Figure S1.** Experimental apparatus of H<sub>2</sub> generation from the FA dehydrogenation.

The average particles sizes were estimated from XRD by Debye-Scherrer. Equation (S1):

$$D = K\lambda / BCOS\theta \quad (1)$$

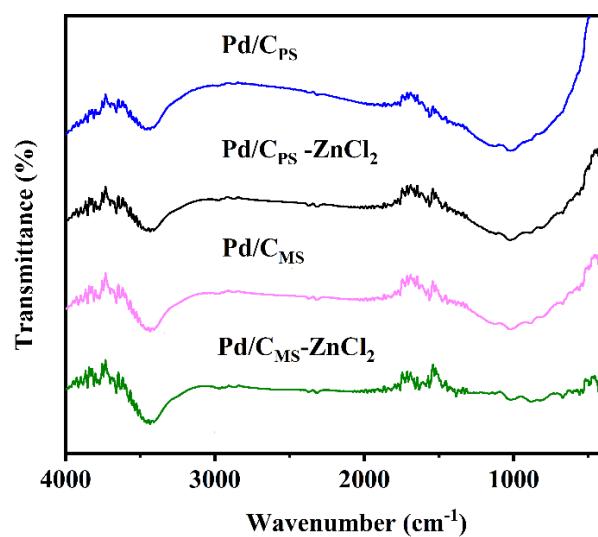

Figure S2. The spectrum of various catalysts.

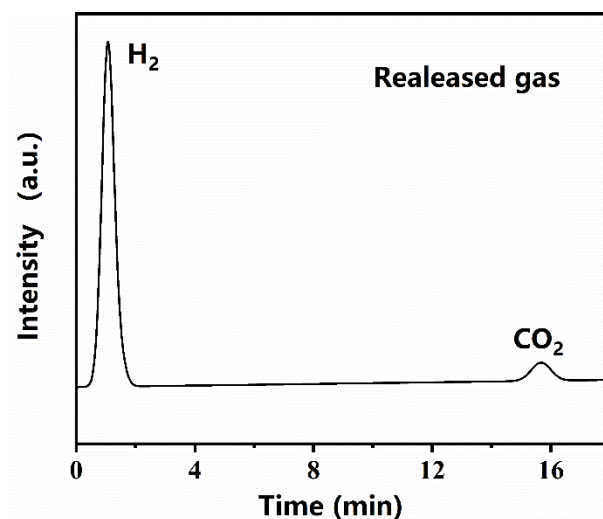

Figure S3. GC spectrum using TCD for the gas from FA over  $\text{Pd/C}_{\text{MS}}\text{-ZnCl}_2$ .

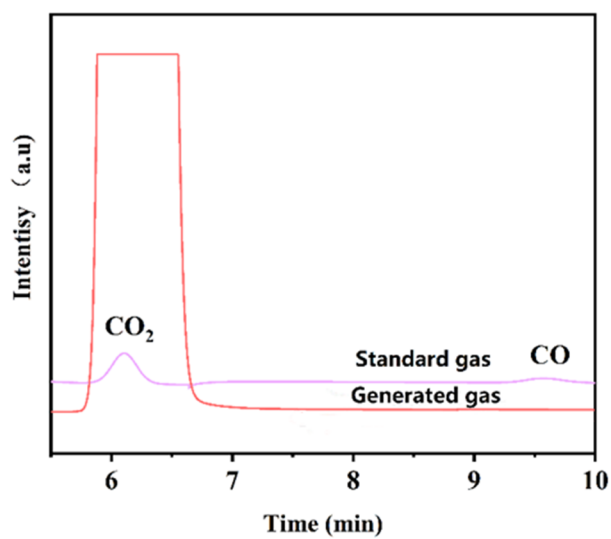

Figure S4. GC spectrum using PDHID for the standard gas and the gas from FA over  $\text{Pd/C}_{\text{MS}}\text{-ZnCl}_2$ .

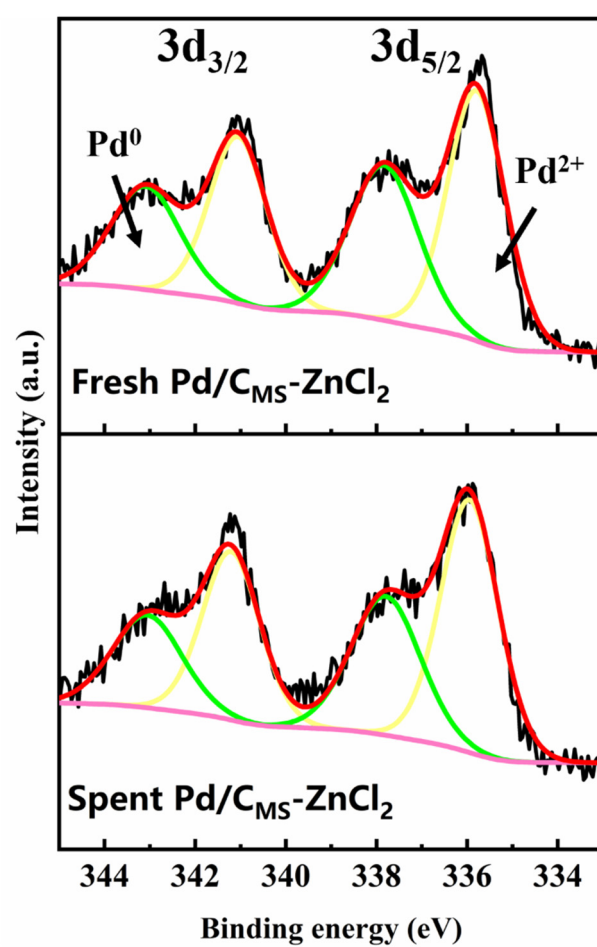

Figure S5. XPS patterns of Pd 3d of Pd/C<sub>MS</sub>-ZnCl<sub>2</sub> before and after reaction.

Table S1. O content of various catalysts (at %).

| Catalysts                             | O     | O1   | O2   | O3   | O4   |
|---------------------------------------|-------|------|------|------|------|
| Pd/C <sub>PS</sub>                    | 6.30  | 0.36 | 2.31 | 3.30 | 0.33 |
| Pd/C <sub>PS</sub> -ZnCl <sub>2</sub> | 10.26 | 0.40 | 4.92 | 4.44 | 0.50 |
| Pd/C <sub>MS</sub>                    | 8.06  | 0.29 | 3.03 | 4.30 | 0.44 |
| Pd/C <sub>MS</sub> -ZnCl <sub>2</sub> | 12.50 | 0.44 | 5.98 | 5.73 | 0.35 |

**Table S2.** C content and Ash of various catalysts.

| Catalysts                             | XPS (at.%) |                   |            |                           | Ash (wt%) |
|---------------------------------------|------------|-------------------|------------|---------------------------|-----------|
|                                       | C          | C=C<br>aromatic C | phenolic C | aliphatic<br>carboxylic C |           |
| Pd/C <sub>PS</sub>                    | 89.17      | 70.19             | 14.86      | 4.12                      | 4.38      |
| Pd/C <sub>PS</sub> -ZnCl <sub>2</sub> | 85.10      | 67.67             | 13.84      | 3.59                      | 3.19      |
| Pd/C <sub>MS</sub>                    | 87.47      | 69.76             | 14.08      | 3.63                      | 0.60      |
| Pd/C <sub>MS</sub> -ZnCl <sub>2</sub> | 83.00      | 61.74             | 17.34      | 3.92                      | 0.21      |

**Table S3.** Pd content of various catalysts.

| Catalysts                             | XPS (at.%) |                 |                  | ICP (wt%) |
|---------------------------------------|------------|-----------------|------------------|-----------|
|                                       | Pd         | Pd <sup>0</sup> | Pd <sup>2+</sup> | Pd        |
| Pd/C <sub>PS</sub>                    | 4.53       | 2.99            | 1.54             | 4.76      |
| Pd/C <sub>PS</sub> -ZnCl <sub>2</sub> | 4.64       | 2.96            | 1.68             | 4.78      |
| Pd/C <sub>MS</sub>                    | 4.47       | 2.91            | 1.56             | 4.67      |
| Pd/C <sub>MS</sub> -ZnCl <sub>2</sub> | 4.50       | 2.90            | 1.60             | 4.70      |

**Table S4.** FA dehydrogenation catalyzed by various catalysts.

| Catalysts                             | TON <sub>x</sub> |       |       |       |
|---------------------------------------|------------------|-------|-------|-------|
|                                       | 1                | 5     | 60    | 120   |
| Pd/C <sub>PS</sub>                    | 5.3              | 43.5  | 108.8 | 130.6 |
| Pd/C <sub>PS</sub> -ZnCl <sub>2</sub> | 19.0             | 92.3  | 387.4 | 462.5 |
| Pd/C <sub>MS</sub>                    | 5.6              | 54.4  | 141.5 | 168.5 |
| Pd/C <sub>MS</sub> -ZnCl <sub>2</sub> | 28.3             | 103.3 | 413.5 | 484.3 |
